# Supplementary material for: Structural and ferroelectric properties of perovskite Pb(1−x)(K0.5Sm0.5)xTiO3 ceramics
Source: Royal Society of Chemistry journal article supplement (doi:10.1039/c7ra07130b), 2017-01-01
Supplement: c7ra07130b1.pdf [file c7ra07130b1.pdf]

## Structural and ferroelectric properties of perovskite $Pb_{(1-x)}(K_{0.5}Sm_{0.5})_xTiO_3$ ceramics

Arun Kumar Yadav<sup>1</sup>, Anita<sup>1</sup>, Sunil Kumar<sup>1</sup>, Anjali panchwane<sup>3</sup>, V. Raghavendra Reddy<sup>3</sup>, Parasharam M. Shirage<sup>1,2</sup>, Sajal Biring<sup>4</sup>, Somaditya Sen<sup>1,2</sup>

<sup>1</sup>Discipline of Metallurgy Engineering and Materials Science, Indian Institute of Technology, Khandwa Road, Indore-453552, India

<sup>2</sup>Discipline of Physics, Indian Institute of Technology, Khandwa Road, Indore-453552, India

<sup>3</sup>UGC-DAE Consortium for Scientific Research, University Campus, Khandwa Road, Indore-452001, India

<sup>4</sup>Electronic Engg., Ming Chi University of Technology, New Taipei City, Taiwan

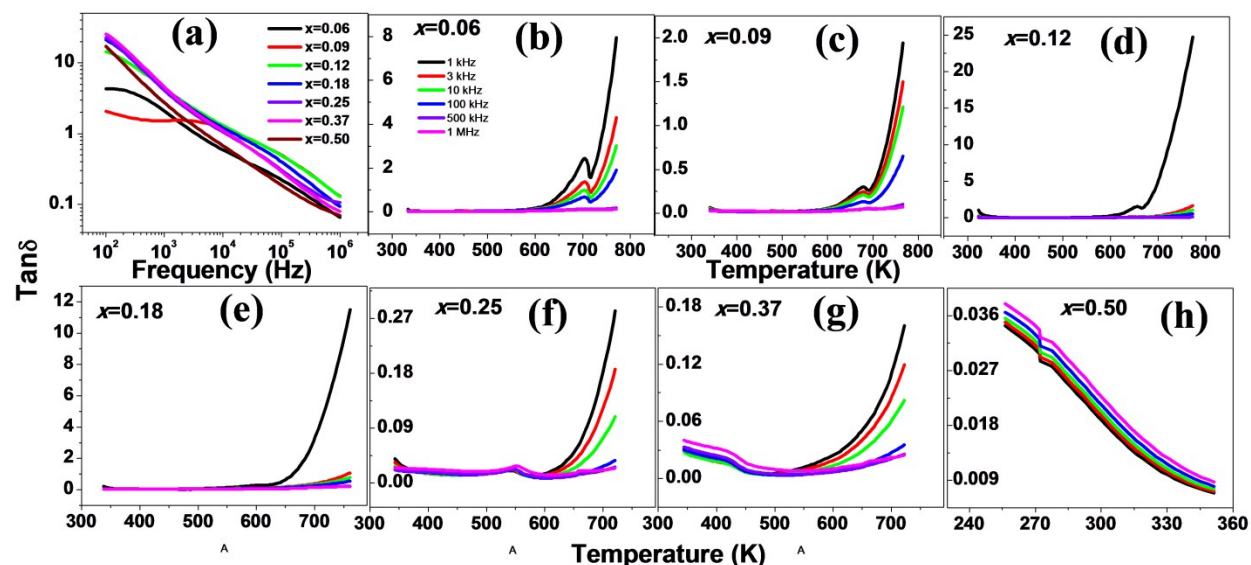

**Figure S1:** (a) Variation of room temperature  $\tan\delta$  as a function of frequency for different compositions. (b)-(h) show the variation of  $\tan\delta$  at various frequencies (1 kHz - 1 MHz) with temperature for different compositions  $x=0.06 - 0.50$ .
